# Supplementary material
Source: PubMed Central journal article supplement (PMC3620414)

Figure S1.

A

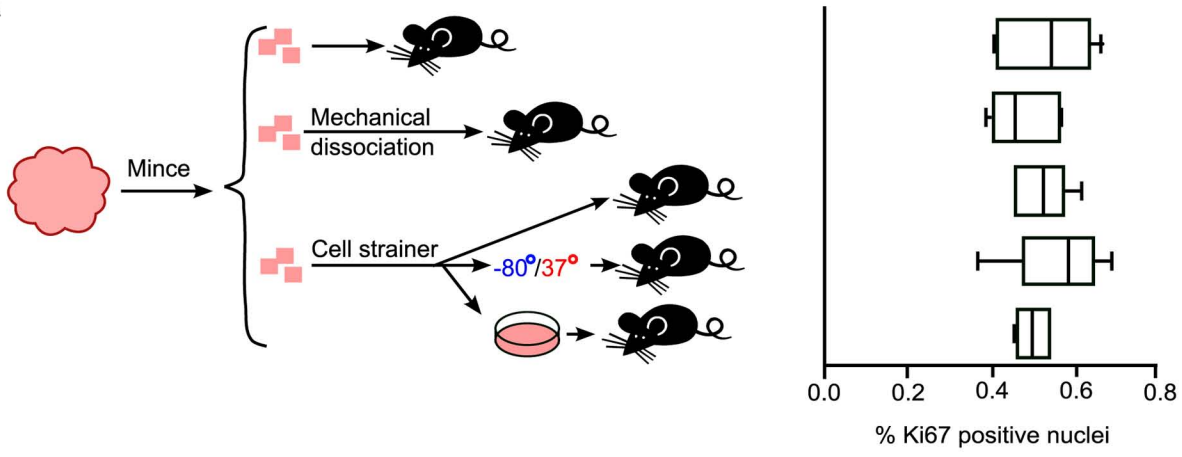

B

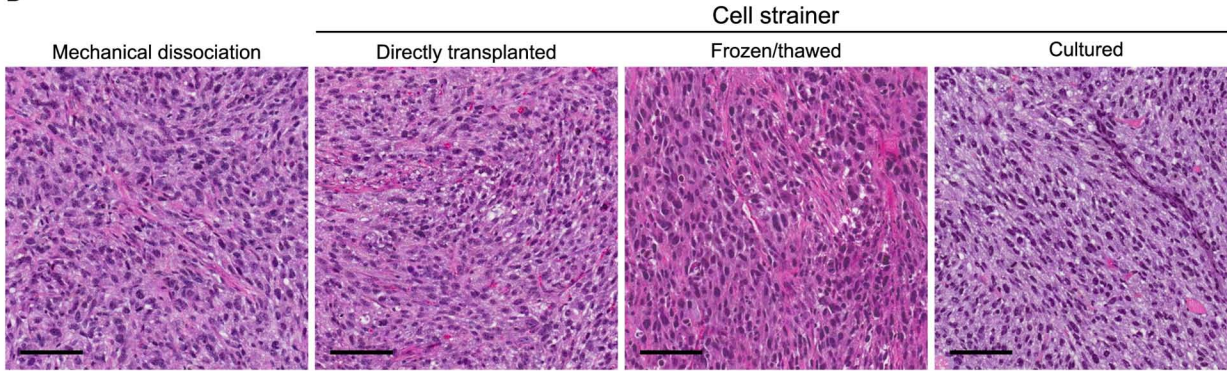

Supplement: mmc1.pdf [file mmc1.pdf]

Figure S2.

A

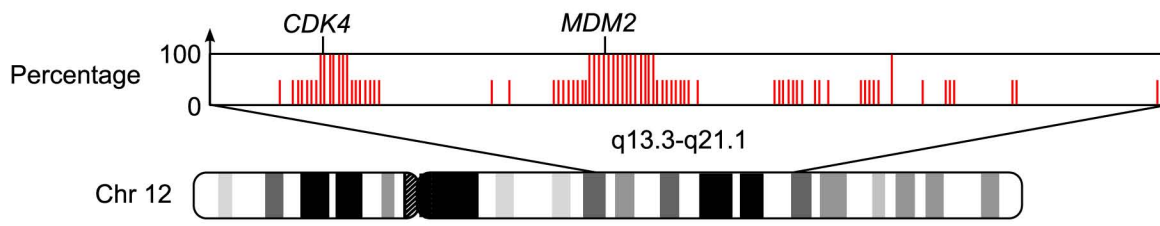

B

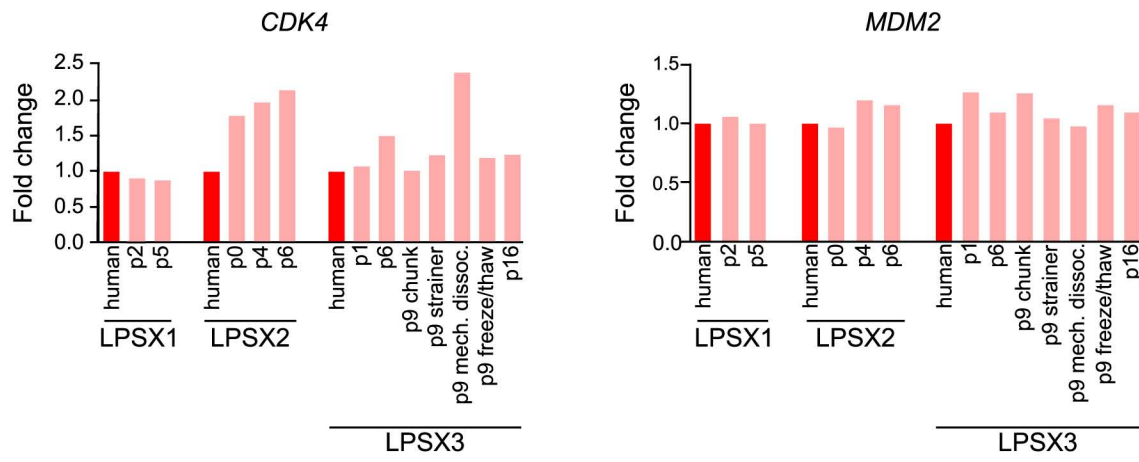

Supplement: mmc2.pdf [file mmc2.pdf]

Figure S3.

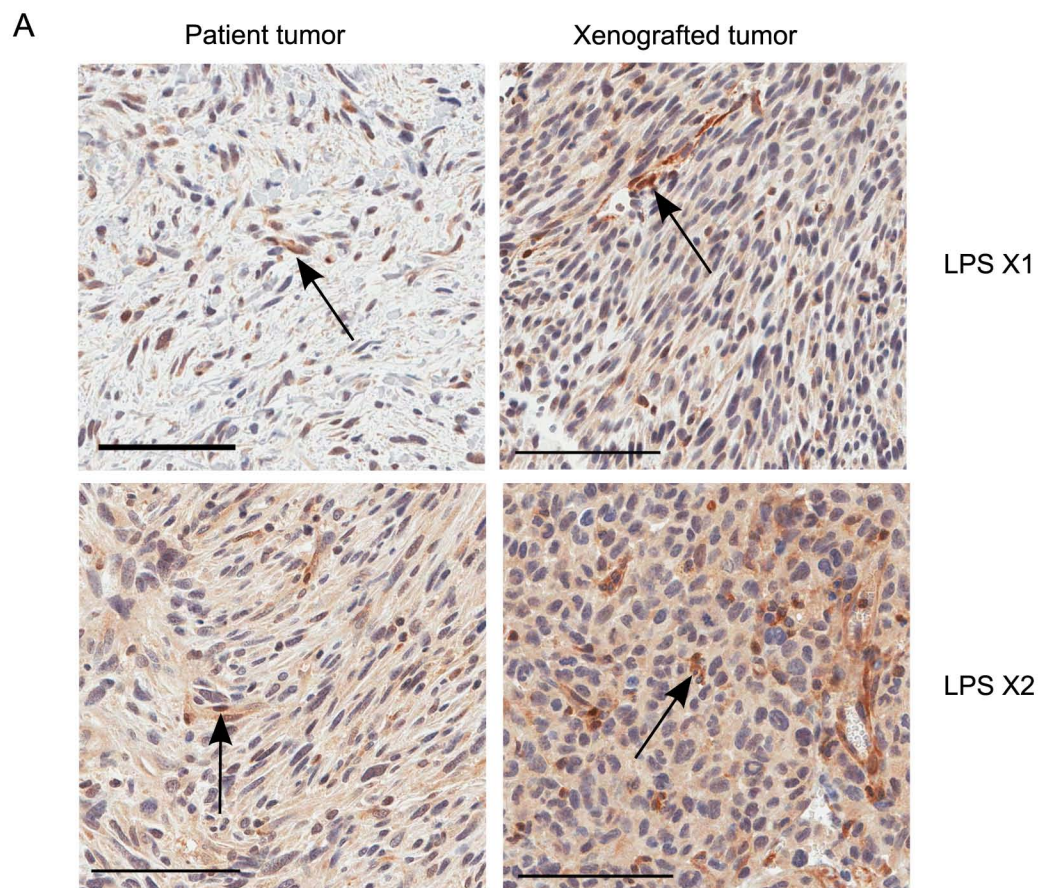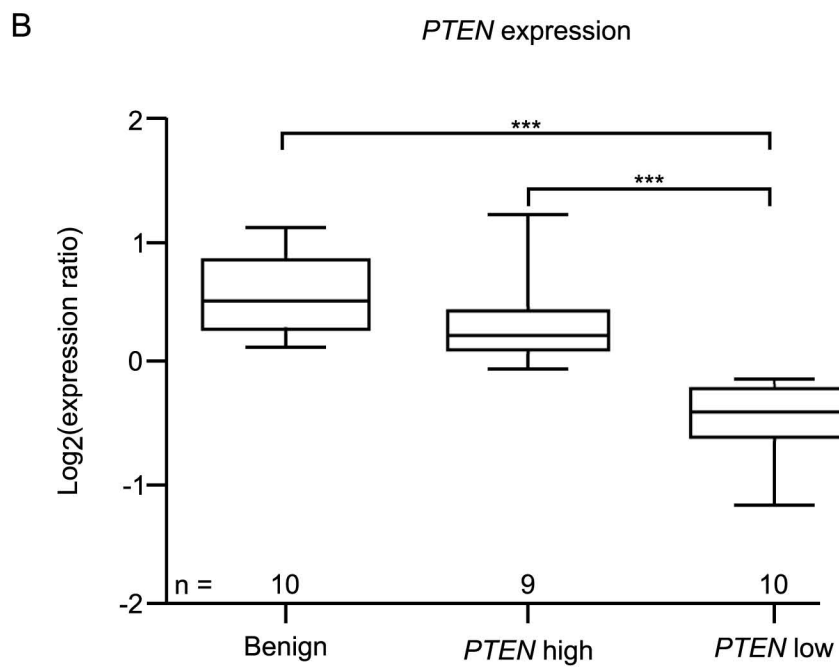

Supplement: mmc3.pdf [file mmc3.pdf]

Figure S4.

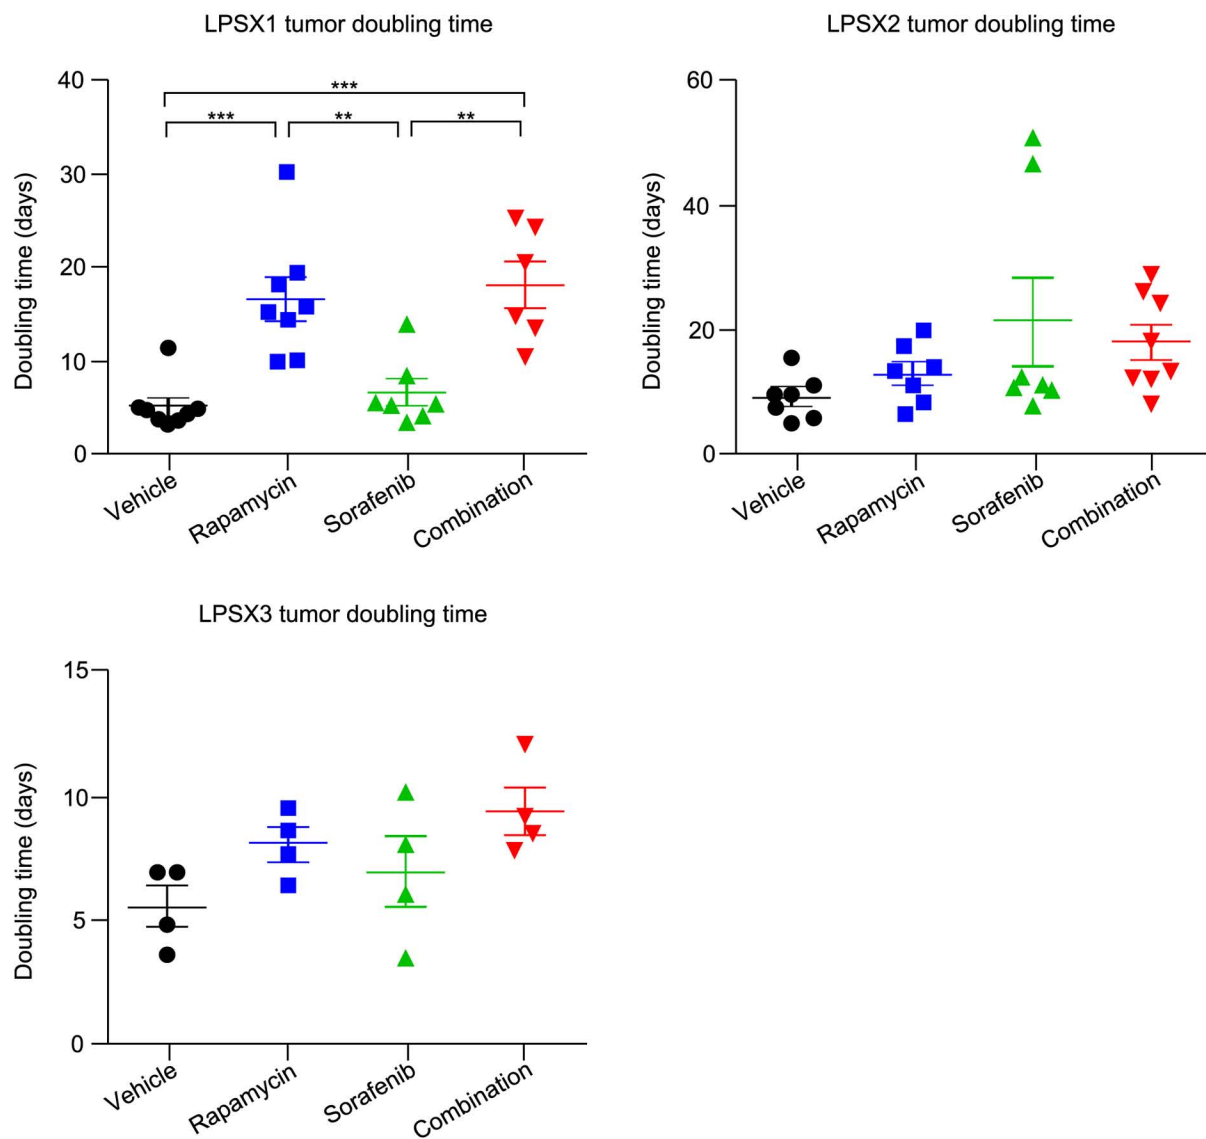

Supplement: mmc4.pdf [file mmc4.pdf]

Figure S5.

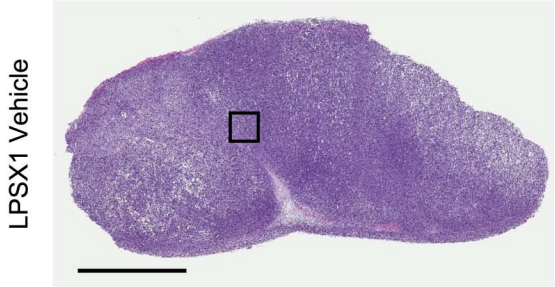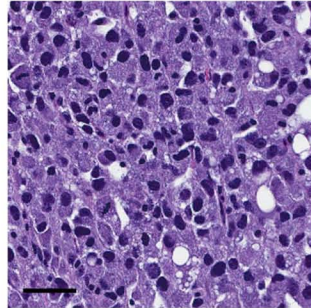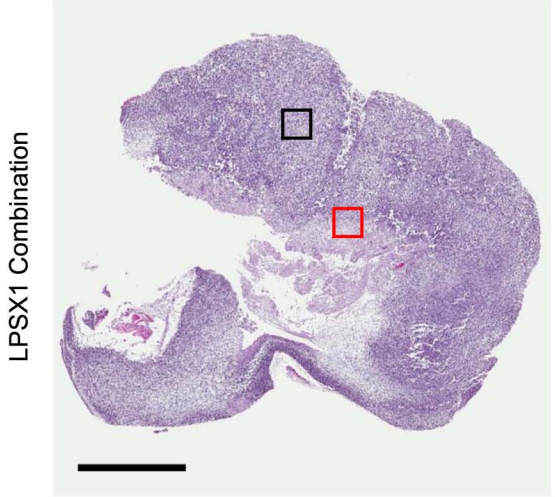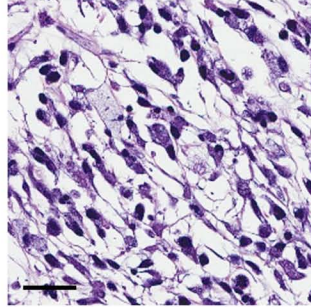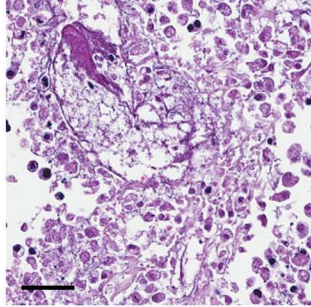

Differentiation

Necrotic area

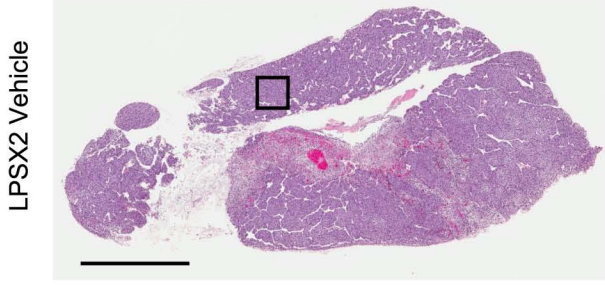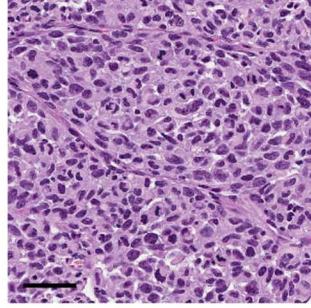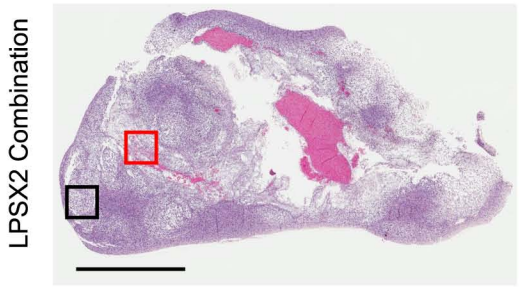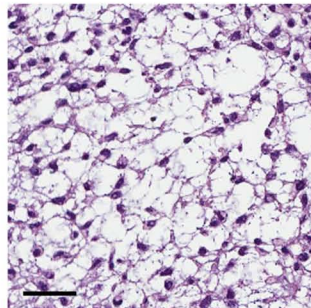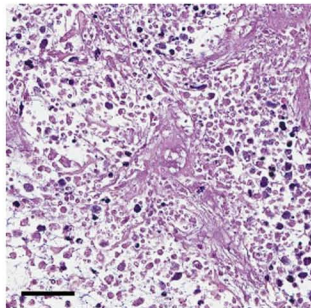

Differentiation

Necrotic area

Supplement: mmc5.pdf [file mmc5.pdf]
